# Supplementary material
Source: PubMed Central journal article supplement (PMC2048696)
Supplement: plntcell_tpc.107.053611_1.pdf [file plntcell_tpc.107.053611_1.pdf]

**Supplemental Figure 1.** DNA and RNA binding by AvrL567 proteins.

Electrophoretic mobility shift assays (EMSA) of AvrL567-A, AvrL567-C and AvrL567-D were performed with **(A, B)** double-stranded DNA pentaprobates 1-6 (PP1-6), **(C)** single-stranded DNA pentaprobates (PP3b, PP4b and PP6b), and **(D)** double-stranded RNA (rPP4 and rPP6). GST: Glutathione-*S*-transferase from *S. japonicum* (negative control).

See Supplemental Table 1 for the sequences of the pentaprobates.

**Supp. Fig. 1A**

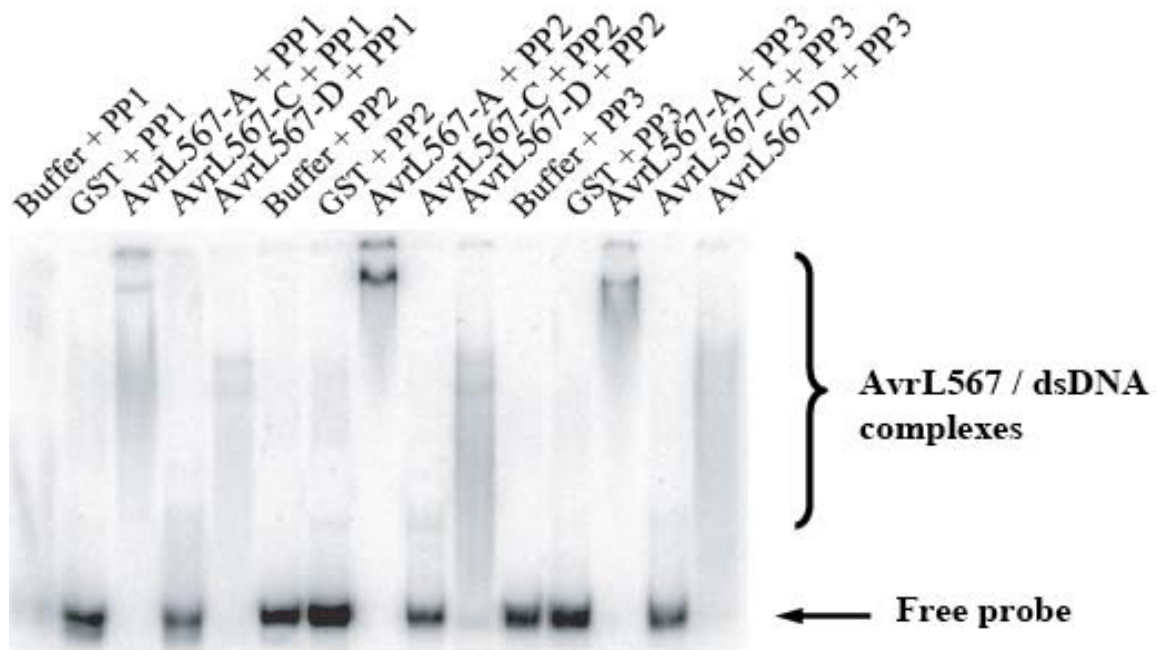

Supp. Fig. 1B

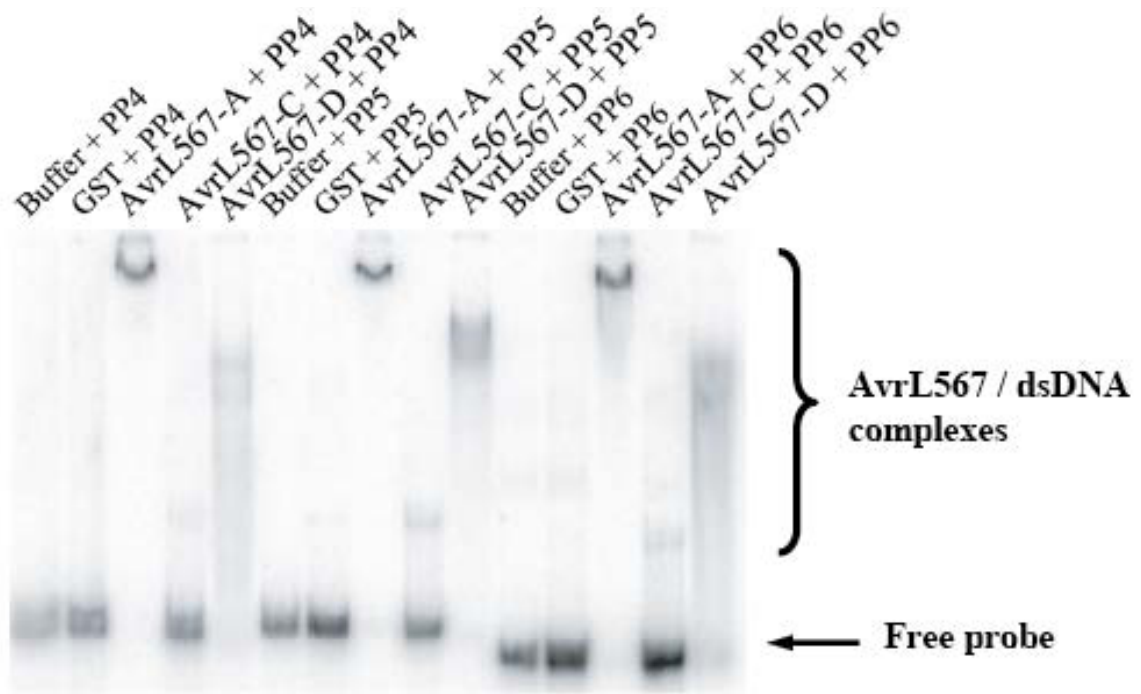

Supp. Fig. 1C

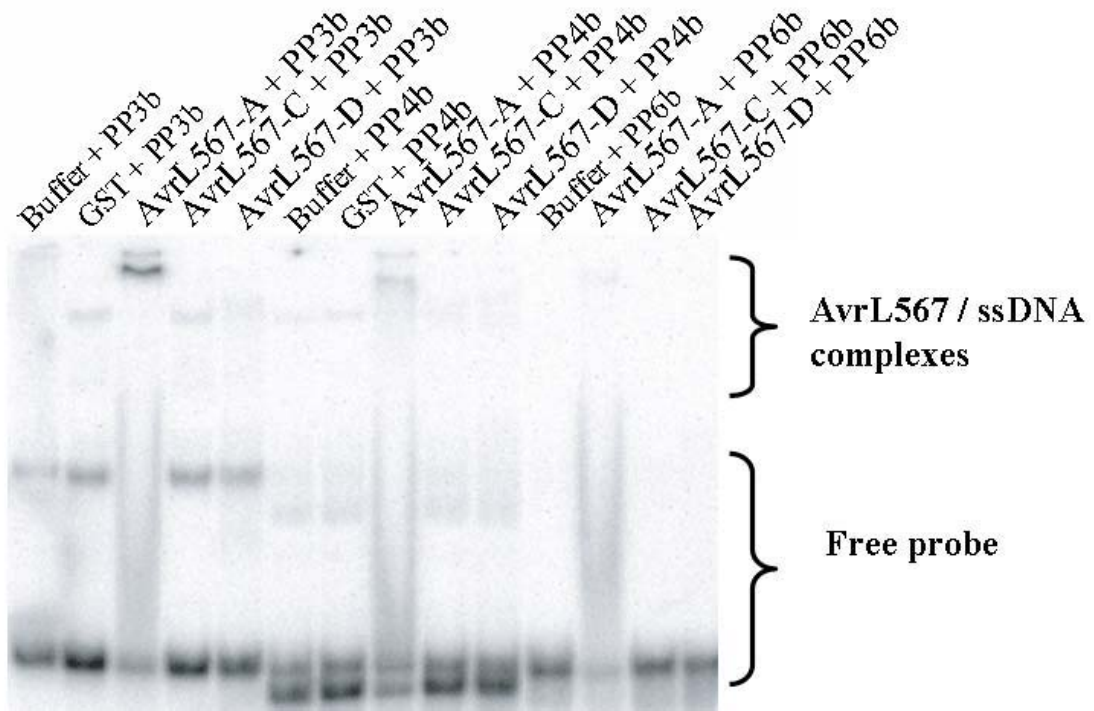

Supp. Fig. 1D

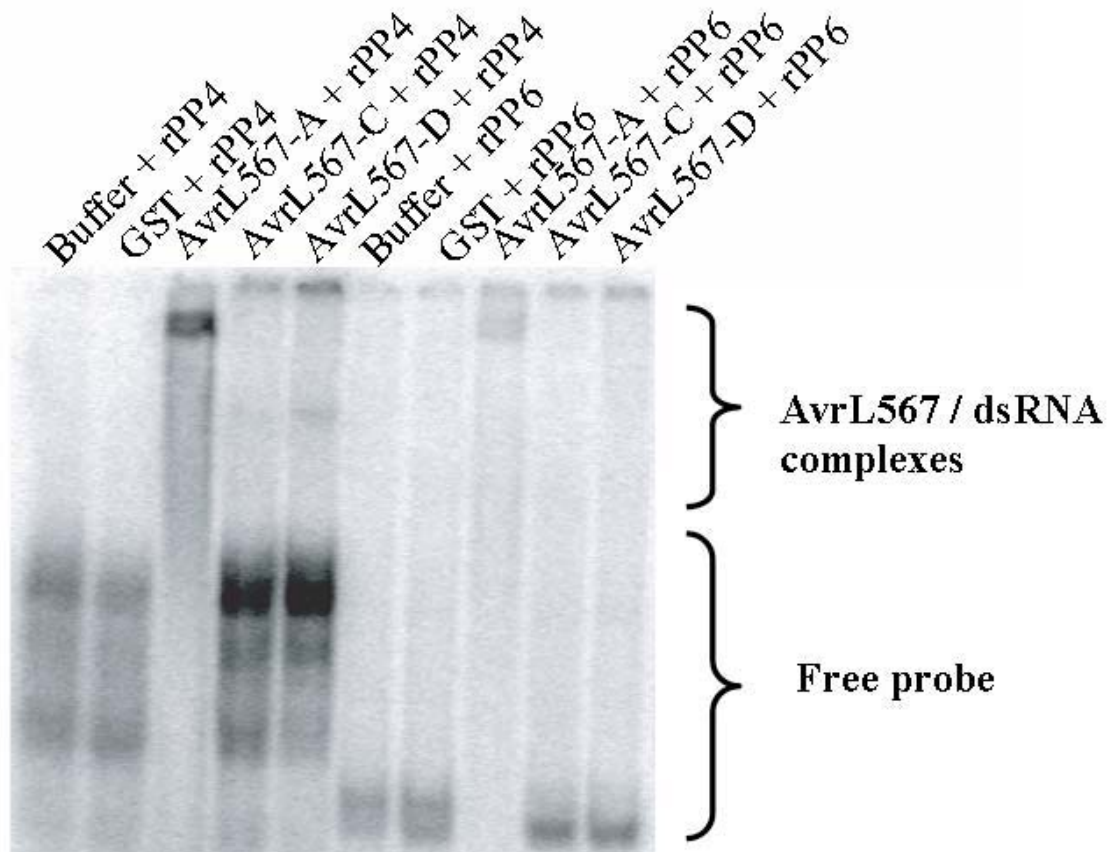

**Supplemental Table 1: Pentaprobe sequences**

| <b>Oligonucleotide name</b>      | <b>Sequence (5'-3')</b>                                                                                       |
|----------------------------------|---------------------------------------------------------------------------------------------------------------|
| Pentaprobe 1 (PP1a) <sup>T</sup> | CGGAATTCTACGAATTTTTCTTTTGTATTTCCTTTTCGCTTT<br>GCTTCTCTCCCTTCGGTTCGTTCGTTTTACCTTGTCTTGC<br>CTTATCTTACTTTA      |
| Pentaprobe 1 (PP1b) <sup>C</sup> | TAAAGTAAGATAAGGCAAGACAAGGTAAAACGGAACAGA<br>ACCGAAGGGAAGAGAAGCAAAGCGAAAGGAAATAAACAA<br>AAGAAAAATTCGTAGAATTCCG  |
| Pentaprobe 2 (PP2a) <sup>T</sup> | TATCTTACTTTAGTTTTCAATTAATTGTGTTGTA CTCTCCTCTG<br>CGTTCACCTAGCTTAACTTGGTTTGGCTTGATTGACTTCAG<br>TTGCGCTCTATTCTA |
| Pentaprobe 2 (PP2b) <sup>C</sup> | TAGAATAGAGCGCAACTGAAGTCAAATCAAGCCAAACCAA<br>GTTAAGCTAAGTGAACGCAGAGGAGAGTACAACACAATTA<br>AATGAAACTAAAGTAAGATA  |
| Pentaprobe 3 (PP3a) <sup>T</sup> | CGCTCTATTCTACTGTCCTGTGCATTCAATCGTTGAGTTCGA<br>TCTAGTCTCGTCTAACCCCTCCCCTGCTCCGCTGGTCTGGCCT<br>CGCCTATCCTACCCAT |
| Pentaprobe 3 (PP3b) <sup>C</sup> | ATGGGTAGGATAGGCGAGGCCAGACCAGCGGAGCAGGGG<br>AGGGTTAGACGAGACTAGATCGAACTCAACGATTGAATGC<br>ACAGGACAGTAGAATAGAGCG  |
| Pentaprobe 4 (PP4a) <sup>T</sup> | TATCCTACCCATTGGGCTCATCTGATCCATCCGGTCCCGTCC<br>ACTCGGCTATGTTATGCTGTATTGCAGTCGTGTCGCGTCGA<br>GCTGCCCTAATCCCACC  |
| Pentaprobe 4 (PP4b) <sup>C</sup> | AAAGTAAGATAAGGCAAGACAAGGTAAAACGGAACAGAA<br>CCGAAGGGAAGAGAAGCAAAGCGAAAGGAAATAAACAAA<br>AGAAAAATTCGTAGAATTCCG   |
| Pentaprobe 5 (PP5a) <sup>T</sup> | CCTAATCCCACCTAGCGTATCGGGTCATGTAGTGCTACGTT<br>ACGGCCCCCGCCGGCATCATATTATATCACCCAGTGTA<br>TGTGGTGTGAGGTTGGAG     |
| Pentaprobe 5 (PP5b) <sup>C</sup> | CTCCAACCTCACACCACATTACACTGGGGTGATATAATATG<br>ATGCCGGGCGGGGGCCGTAACGTAGCACTACATGACCCGA<br>TACGCTAGGTGGGATTAGG  |
| Pentaprobe 6 (PP6a) <sup>T</sup> | GTGAGGTTGGAGTCCGACCTGGAATCTCAGCCTGACGTGCC<br>ATGCGGTGCGATGTCACGCCGCGCCACGGTATAGTATGGTA<br>CGGGATCCCG          |
| Pentaprobe 6 (PP6b) <sup>C</sup> | CGGGATCCCGTACCATACTATAACCGTGGCGCGGGCGTGACAT<br>CGCACCGCATGGCACGTCAGGCTGAGATTCCAGGTCCGGAC<br>TCCAACCTCAC       |

<sup>T</sup> template<sup>C</sup> complementary
